# Supplementary material for: Genetic Carriers and Genomic Distribution of cadA6—A Novel Variant of a Cadmium Resistance Determinant Identified in Listeria spp
Source: MDPI journal article supplement (doi:10.3390/ijms21228713), 2020-11-18
Supplement: s1 [file s1]

**Table S1.** Characterization of *Listeria* spp. strains, isolated from water and soil samples, used in this study.

| No.              | Strain | Source of isolation                   | Phenotypic analysis<br>■ growth □ lack of growth |                    |                     |       |                        |                     |                      |                     |                                 |                      |                      | Plasmid profile |
|------------------|--------|---------------------------------------|--------------------------------------------------|--------------------|---------------------|-------|------------------------|---------------------|----------------------|---------------------|---------------------------------|----------------------|----------------------|-----------------|
|                  |        |                                       | Cadmium chloride                                 |                    |                     |       | Sodium (meta) arsenite |                     |                      |                     | Copper(II) sulfate pentahydrate |                      |                      |                 |
|                  |        |                                       | Concentration [ug/ml]                            |                    |                     | PCR   | concentration [ug/ml]  |                     |                      | PCR                 | concentration [ug/ml]           |                      |                      |                 |
|                  |        |                                       | 35<br>(0.19<br>mM)                               | 75<br>(0.41<br>mM) | 150<br>(0.82<br>mM) |       | 250<br>(1.92<br>mM)    | 500<br>(3.85<br>mM) | 1000<br>(7.70<br>mM) |                     | 600<br>(2.40<br>mM)             | 1200<br>(4.81<br>mM) | 2400<br>(9.61<br>mM) |                 |
| L. monocytogenes |        |                                       |                                                  |                    |                     |       |                        |                     |                      |                     |                                 |                      |                      |                 |
| 1                | Sr1    | Forest                                | ■                                                | ■                  | ■                   | cadA1 | □                      | □                   | □                    |                     | ■                               | □                    | □                    | p1              |
| 2                | Sr2    | Forest                                | ■                                                | ■                  | ■                   | cadA1 | □                      | □                   | □                    |                     | ■                               | □                    | □                    | p1              |
| 3                | Sr6    | Pine forest, Kampinoski National Park | ■                                                | ■                  | ■                   | cadA1 | □                      | □                   | □                    |                     | ■                               | ■                    | □                    | p1              |
| 4                | Sr7    | Pine forest, Kampinoski National Park | ■                                                | ■                  | ■                   | cadA1 | □                      | □                   | □                    |                     | ■                               | □                    | □                    | p1              |
| 5                | Sr22   | Vegetable garden                      | □                                                | □                  | □                   |       | □                      | □                   | □                    |                     | ■                               | ■                    | □                    |                 |
| 6                | Sr35   | Garden                                | ■                                                | ■                  | ■                   | cadA4 | ■                      | ■                   | ■                    | arsA1, arsA2 (LGI2) | ■                               | □                    | □                    |                 |
| 7                | Sr44   | Pine forest                           | □                                                | □                  | □                   |       | □                      | □                   | □                    |                     | ■                               | ■                    | □                    |                 |
| 8                | Sr47   | Pine forest                           | □                                                | □                  | □                   |       | □                      | □                   | □                    |                     | ■                               | ■                    | □                    |                 |
| 9                | Sr55   | City Park „Park Saski”                | □                                                | □                  | □                   |       | □                      | □                   | □                    |                     | ■                               | ■                    | □                    |                 |
| 10               | Sr57   | City Park „Park Saski”                | □                                                | □                  | □                   |       | □                      | □                   | □                    |                     | ■                               | □                    | □                    |                 |
| 11               | Sr91   | Forest                                | □                                                | □                  | □                   |       | □                      | □                   | □                    |                     | ■                               | ■                    | □                    |                 |
| 12               | Sr106  | City                                  | □                                                | □                  | □                   |       | □                      | □                   | □                    |                     | ■                               | ■                    | □                    |                 |
| 13               | Sr117  | City Park                             | □                                                | □                  | □                   |       | □                      | □                   | □                    |                     | ■                               | □                    | □                    |                 |

|                            |       |                         |                          |                          |                          |              |                          |                          |                          |                          |                          |                          |                          |               |
|----------------------------|-------|-------------------------|--------------------------|--------------------------|--------------------------|--------------|--------------------------|--------------------------|--------------------------|--------------------------|--------------------------|--------------------------|--------------------------|---------------|
| 14                         | Sr118 | City Park               | <input type="checkbox"/> | <input type="checkbox"/> | <input type="checkbox"/> |              | <input type="checkbox"/> | <input type="checkbox"/> | <input type="checkbox"/> |                          | ■                        | ■                        | ■                        | p2            |
| 15                         | Sr119 | Wisła River bank        | ■                        | ■                        | ■                        | <i>cadA6</i> | <input type="checkbox"/> | <input type="checkbox"/> | <input type="checkbox"/> |                          | ■                        | ■                        | <input type="checkbox"/> |               |
| 16                         | Sr121 | Wisła River bank        | <input type="checkbox"/> | <input type="checkbox"/> | <input type="checkbox"/> |              | <input type="checkbox"/> | <input type="checkbox"/> | <input type="checkbox"/> |                          | ■                        | ■                        | <input type="checkbox"/> | p3            |
| 17                         | Sr122 | Wisła River bank        | <input type="checkbox"/> | <input type="checkbox"/> | <input type="checkbox"/> |              | <input type="checkbox"/> | <input type="checkbox"/> | <input type="checkbox"/> |                          | ■                        | <input type="checkbox"/> | <input type="checkbox"/> |               |
| 18                         | Sr125 | Wisła River bank        | ■                        | ■                        | ■                        | <i>cadA6</i> | <input type="checkbox"/> | <input type="checkbox"/> | <input type="checkbox"/> |                          | ■                        | <input type="checkbox"/> | <input type="checkbox"/> |               |
| 19                         | Sr126 | Wisła River bank        | ■                        | ■                        | ■                        | <i>cadA6</i> | <input type="checkbox"/> | <input type="checkbox"/> | <input type="checkbox"/> |                          | ■                        | ■                        | <input type="checkbox"/> | p4            |
| 20                         | Sr130 | Forest                  | ■                        | ■                        | ■                        | <i>cadA6</i> | <input type="checkbox"/> | <input type="checkbox"/> | <input type="checkbox"/> |                          | ■                        | <input type="checkbox"/> | <input type="checkbox"/> |               |
| 21                         | Sr131 | Shrubs                  | ■                        | ■                        | ■                        | <i>cadA6</i> | <input type="checkbox"/> | <input type="checkbox"/> | <input type="checkbox"/> |                          | ■                        | ■                        | <input type="checkbox"/> |               |
| 22                         | Sr132 | Shrubs                  | ■                        | ■                        | ■                        | <i>cadA6</i> | <input type="checkbox"/> | <input type="checkbox"/> | <input type="checkbox"/> |                          | ■                        | <input type="checkbox"/> | <input type="checkbox"/> |               |
| 23                         | Sr134 | City Park „Park Praski” | <input type="checkbox"/> | <input type="checkbox"/> | <input type="checkbox"/> |              | <input type="checkbox"/> | <input type="checkbox"/> | <input type="checkbox"/> |                          | ■                        | <input type="checkbox"/> | <input type="checkbox"/> |               |
| 24                         | Sr154 | Field (farm)            | <input type="checkbox"/> | <input type="checkbox"/> | <input type="checkbox"/> |              | <input type="checkbox"/> | <input type="checkbox"/> | <input type="checkbox"/> |                          | ■                        | <input type="checkbox"/> | <input type="checkbox"/> | p5            |
| <b><i>L. seeligeri</i></b> |       |                         |                          |                          |                          |              |                          |                          |                          |                          |                          |                          |                          |               |
| 25                         | Sr3   | City                    | <input type="checkbox"/> | <input type="checkbox"/> | <input type="checkbox"/> |              | <input type="checkbox"/> | <input type="checkbox"/> | <input type="checkbox"/> |                          | <input type="checkbox"/> | <input type="checkbox"/> | <input type="checkbox"/> |               |
| 26                         | Sr4   | City                    | <input type="checkbox"/> | <input type="checkbox"/> | <input type="checkbox"/> |              | <input type="checkbox"/> | <input type="checkbox"/> | <input type="checkbox"/> |                          | <input type="checkbox"/> | <input type="checkbox"/> | <input type="checkbox"/> |               |
| 27                         | Sr5   | City                    | <input type="checkbox"/> | <input type="checkbox"/> | <input type="checkbox"/> |              | <input type="checkbox"/> | <input type="checkbox"/> | <input type="checkbox"/> |                          | <input type="checkbox"/> | <input type="checkbox"/> | <input type="checkbox"/> |               |
| 28                         | Sr12  | Fruit orchard           | ■                        | ■                        | <input type="checkbox"/> | <i>cadA6</i> | ■                        | ■                        | <input type="checkbox"/> | <i>arsA (Tn554-like)</i> | ■                        | ■                        | <input type="checkbox"/> | p6<br>(pLIS4) |
| 29                         | Sr13  | Fruit orchard           | ■                        | ■                        | <input type="checkbox"/> | <i>cadA6</i> | <input type="checkbox"/> | <input type="checkbox"/> | <input type="checkbox"/> |                          | ■                        | ■                        | <input type="checkbox"/> |               |
| 30                         | Sr14  | Vegetable garden        | <input type="checkbox"/> | <input type="checkbox"/> | <input type="checkbox"/> |              | <input type="checkbox"/> | <input type="checkbox"/> | <input type="checkbox"/> |                          | <input type="checkbox"/> | <input type="checkbox"/> | <input type="checkbox"/> |               |
| 31                         | Sr15  | Vegetable garden        | <input type="checkbox"/> | <input type="checkbox"/> | <input type="checkbox"/> |              | <input type="checkbox"/> | <input type="checkbox"/> | <input type="checkbox"/> |                          | ■                        | <input type="checkbox"/> | <input type="checkbox"/> |               |
| 32                         | Sr17  | Vegetable garden        | <input type="checkbox"/> | <input type="checkbox"/> | <input type="checkbox"/> |              | <input type="checkbox"/> | <input type="checkbox"/> | <input type="checkbox"/> |                          | <input type="checkbox"/> | <input type="checkbox"/> | <input type="checkbox"/> |               |

|    |      |                        |   |   |   |                 |   |   |   |                          |   |   |   |    |
|----|------|------------------------|---|---|---|-----------------|---|---|---|--------------------------|---|---|---|----|
| 33 | Sr18 | Vegetable garden       | ■ | ■ | □ | <i>cadA6</i>    | □ | □ | □ |                          | ■ | □ | □ |    |
| 34 | Sr23 | Vegetable garden       | □ | □ | □ |                 | □ | □ | □ |                          | ■ | ■ | □ |    |
| 35 | Sr24 | Garden                 | ■ | ■ | □ | <i>cadA6</i>    | □ | □ | □ |                          | ■ | ■ | □ | p6 |
| 36 | Sr25 | Garden                 | ■ | ■ | □ | <i>cadA6</i>    | ■ | ■ | □ | <i>arsA</i> (Tn554-like) | ■ | ■ | □ |    |
| 37 | Sr26 | Garden                 | ■ | ■ | □ | <i>cadA6</i>    | ■ | ■ | □ | <i>arsA</i> (Tn554-like) | ■ | ■ | □ |    |
| 38 | Sr28 | Garden                 | □ | □ | □ |                 | □ | □ | □ |                          | ■ | ■ | □ |    |
| 39 | Sr29 | Garden                 | □ | □ | □ |                 | □ | □ | □ |                          | ■ | ■ | □ |    |
| 40 | Sr31 | Compost                | □ | □ | □ |                 | ■ | ■ | □ | <i>arsA</i> (Tn554-like) | ■ | ■ | □ |    |
| 41 | Sr32 | Compost                | ■ | ■ | □ | <i>cadA6</i>    | ■ | ■ | □ | <i>arsA</i> (Tn554-like) | ■ | ■ | □ |    |
| 42 | Sr33 | Compost                | ■ | ■ | □ | <i>cadA6</i>    | ■ | ■ | □ | <i>arsA</i> (Tn554-like) | ■ | ■ | □ | p6 |
| 43 | Sr34 | Compost                | ■ | □ | □ |                 | ■ | □ | □ |                          | ■ | □ | □ |    |
| 44 | Sr36 | Garden                 | □ | □ | □ |                 | □ | □ | □ |                          | ■ | □ | □ |    |
| 45 | Sr40 | City Park „Park Saski” | ■ | ■ | □ | ND <sup>1</sup> | ■ | ■ | ■ | ND                       | ■ | ■ | □ |    |
| 46 | Sr41 | Shrubs near fields     | □ | □ | □ |                 | ■ | ■ | □ | ND                       | ■ | ■ | □ |    |
| 47 | Sr43 | Pine forest            | □ | □ | □ |                 | ■ | ■ | □ | ND                       | ■ | ■ | □ |    |
| 48 | Sr45 | Pine forest            | □ | □ | □ |                 | ■ | ■ | □ | ND                       | ■ | ■ | □ |    |
| 49 | Sr46 | Pine forest            | ■ | ■ | ■ | <i>cadA6</i>    | ■ | □ | □ |                          | ■ | ■ | □ |    |
| 50 | Sr48 | Pine forest            | ■ | ■ | ■ | <i>cadA6</i>    | ■ | ■ | □ | ND                       | ■ | ■ | □ |    |
| 51 | Sr50 | City Park „Park Saski” | ■ | ■ | ■ | <i>cadA1</i>    | □ | □ | □ |                          | ■ | □ | □ | p7 |
| 52 | Sr58 | City Park „Park Saski” | ■ | ■ | ■ | <i>cadA6</i>    | □ | □ | □ |                          | ■ | □ | □ |    |

|    |      |                 |   |   |   |              |   |   |   |                          |   |   |   |               |
|----|------|-----------------|---|---|---|--------------|---|---|---|--------------------------|---|---|---|---------------|
| 53 | Sr59 | City            | ■ | ■ | ■ | <i>cadA1</i> | ■ | □ | □ | <i>arsA</i> (Tn554-like) | ■ | ■ | □ | p7            |
| 54 | Sr60 | City            | □ | □ | □ |              | □ | □ | □ |                          | □ | □ | □ |               |
| 55 | Sr61 | City            | □ | □ | □ |              | ■ | □ | □ |                          | □ | □ | □ |               |
| 56 | Sr62 | City            | □ | □ | □ |              | □ | □ | □ |                          | ■ | ■ | □ |               |
| 57 | Sr64 | City            | ■ | ■ | ■ | <i>cadA6</i> | ■ | □ | □ | <i>arsA</i> (Tn554-like) | ■ | ■ | □ |               |
| 58 | Sr65 | City            | ■ | ■ | ■ | <i>cadA6</i> | ■ | ■ | □ | <i>arsA</i> (Tn554-like) | □ | □ | □ |               |
| 59 | Sr66 | City            | □ | □ | □ |              | □ | □ | □ |                          | ■ | ■ | □ |               |
| 60 | Sr67 | City            | ■ | ■ | ■ | <i>cadA6</i> | ■ | ■ | □ | <i>arsA</i> (Tn554-like) | ■ | ■ | □ |               |
| 61 | Sr68 | City            | ■ | □ | □ |              | ■ | □ | □ |                          | ■ | □ | □ |               |
| 62 | Sr69 | City            | ■ | ■ | ■ | <i>cadA6</i> | ■ | ■ | □ | <i>arsA</i> (Tn554-like) | ■ | ■ | □ |               |
| 63 | Sr70 | City            | ■ | ■ | ■ | <i>cadA6</i> | ■ | □ | □ | <i>arsA</i> (Tn554-like) | ■ | ■ | □ |               |
| 64 | Sr71 | City            | ■ | ■ | ■ | <i>cadA6</i> | ■ | ■ | □ | <i>arsA</i> (Tn554-like) | ■ | ■ | □ | p6            |
| 65 | Sr72 | City            | ■ | ■ | ■ | <i>cadA6</i> | ■ | □ | □ | <i>arsA</i> (Tn554-like) | ■ | ■ | □ |               |
| 66 | Sr73 | Dry pine forest | ■ | ■ | ■ | <i>cadA6</i> | ■ | ■ | □ | <i>arsA</i> (Tn554-like) | ■ | □ | □ | p8<br>(pLIS5) |
| 67 | Sr74 | Dry pine forest | ■ | ■ | ■ | <i>cadA6</i> | ■ | ■ | □ | <i>arsA</i> (Tn554-like) | ■ | □ | □ | p8            |
| 68 | Sr75 | Dry pine forest | ■ | ■ | ■ | <i>cadA6</i> | ■ | ■ | □ | <i>arsA</i> (Tn554-like) | ■ | ■ | □ |               |
| 69 | Sr77 | Dry pine forest | ■ | ■ | ■ | <i>cadA1</i> | ■ | □ | □ |                          | ■ | □ | □ | p9            |
| 70 | Sr78 | Dry pine forest | ■ | ■ | ■ | <i>cadA1</i> | □ | □ | □ |                          | ■ | ■ | □ | p7            |
| 71 | Sr80 | Dry pine forest | □ | □ | □ |              | ■ | □ | □ |                          | □ | □ | □ |               |
| 72 | Sr81 | Dry pine forest | ■ | ■ | ■ | <i>cadA6</i> | ■ | ■ | □ | <i>arsA</i> (Tn554-like) | ■ | ■ | □ |               |

|    |             |                              |   |   |   |              |   |   |   |                          |   |   |   |     |
|----|-------------|------------------------------|---|---|---|--------------|---|---|---|--------------------------|---|---|---|-----|
| 73 | Sr85        | City Park „Pola Mokotowskie” | □ | □ | □ |              | ■ | ■ | □ | ND                       | ■ | ■ | □ |     |
| 74 | Sr86        | Forest, near river bank      | □ | □ | □ |              | ■ | □ | □ |                          | ■ | ■ | □ |     |
| 75 | Sr87        | Forest, near river bank      | □ | □ | □ |              | ■ | □ | □ |                          | ■ | ■ | □ |     |
| 76 | Sr88        | Forest, near river bank      | □ | □ | □ |              | □ | □ | □ |                          | ■ | ■ | □ |     |
| 77 | Sr89        | Forest                       | □ | □ | □ |              | □ | □ | □ |                          | ■ | ■ | □ |     |
| 78 | Sr93        | Forest                       | □ | □ | □ |              | □ | □ | □ |                          | ■ | ■ | □ |     |
| 79 | Sr94        | Forest                       | □ | □ | □ |              | ■ | □ | □ |                          | ■ | ■ | □ |     |
| 80 | Sr95        | Forest                       | □ | □ | □ |              | □ | □ | □ |                          | ■ | □ | □ |     |
| 81 | Sr97        | Forest                       | □ | □ | □ |              | □ | □ | □ |                          | ■ | □ | □ |     |
| 82 | Sr99        | City Park „Park Saski”       | □ | □ | □ |              | ■ | □ | □ |                          | □ | □ | □ |     |
| 83 | Sr100       | City Park „Park Saski”       | □ | □ | □ |              | ■ | ■ | □ | <i>arsA</i> (Tn554-like) | ■ | ■ | □ |     |
| 84 | Sr120       | Wisła River bank             | ■ | ■ | □ | ND           | ■ | ■ | □ | ND                       | ■ | □ | □ |     |
| 85 | Sr123       | Wisła River bank             | □ | □ | □ |              | □ | □ | □ |                          | ■ | □ | □ |     |
| 86 | Sr124       | Wisła River bank             | □ | □ | □ |              | □ | □ | □ |                          | ■ | □ | □ |     |
| 87 | Sr127       | Wisła River bank             | □ | □ | □ |              | ■ | □ | □ |                          | □ | □ | □ | p10 |
| 88 | Sr128       | Wisła River bank             | ■ | ■ | ■ | <i>cadA6</i> | ■ | ■ | □ | <i>arsA</i> (Tn554-like) | ■ | □ | □ |     |
| 89 | Sr129       | Wisła River bank             | □ | □ | □ |              | ■ | ■ | □ | ND                       | ■ | □ | □ |     |
| 90 | Sr140       | Field (farm)                 | □ | □ | □ |              | ■ | □ | □ |                          | ■ | □ | □ |     |
| 91 | Sr141       | Field (farm)                 | □ | □ | □ |              | □ | □ | □ |                          | ■ | ■ | □ |     |
| 92 | FSL S4-0003 | USA, pristine vegetation     | □ | □ | □ |              | □ | □ | □ |                          | ■ | ■ | □ |     |

|                          |             |                                  |   |   |   |              |   |   |   |    |   |   |   |     |
|--------------------------|-------------|----------------------------------|---|---|---|--------------|---|---|---|----|---|---|---|-----|
| 93                       | FSL S4-0057 | USA, pristine soil               | ■ | ■ | □ | <i>cadA1</i> | □ | □ | □ |    | ■ | ■ | □ | p11 |
| 94                       | FSL S4-0073 | USA, pristine soil               | □ | □ | □ |              | ■ | ■ | □ | ND | ■ | □ | □ |     |
| <b><i>L. innocua</i></b> |             |                                  |   |   |   |              |   |   |   |    |   |   |   |     |
| 95                       | Sr9         | Swamps, Kampinoski National Park | □ | □ | □ |              | □ | □ | □ |    | ■ | ■ | □ |     |
| 96                       | Sr10        | Swamps, Kampinoski National Park | □ | □ | □ |              | □ | □ | □ |    | ■ | □ | □ |     |
| 97                       | Sr49        | City Park „Park Saski”           | ■ | ■ | □ | <i>cadA6</i> | □ | □ | □ |    | ■ | ■ | □ |     |
| 98                       | Sr51        | City Park „Pola Mokotowskie”     | □ | □ | □ |              | □ | □ | □ |    | ■ | ■ | □ |     |
| 99                       | Sr52        | City Park „Park Saski”           | □ | □ | □ |              | □ | □ | □ |    | ■ | □ | □ |     |
| 100                      | Sr53        | City Park „Park Saski”           | ■ | ■ | □ | <i>cadA1</i> | ■ | □ | □ |    | ■ | ■ | □ |     |
| 101                      | Sr56        | City Park „Park Saski”           | □ | □ | □ |              | □ | □ | □ |    | ■ | □ | □ |     |
| 102                      | Sr90        | Forest                           | □ | □ | □ |              | □ | □ | □ |    | ■ | ■ | □ |     |
| 103                      | Sr92        | Forest                           | □ | □ | □ |              | □ | □ | □ |    | ■ | ■ | □ |     |
| 104                      | Sr96        | City Park „Pola Mokotowskie”     | □ | □ | □ |              | □ | □ | □ |    | ■ | ■ | □ |     |
| 105                      | Sr98        | Swamps                           | □ | □ | □ |              | □ | □ | □ |    | ■ | ■ | □ |     |
| 106                      | Sr101       | Vegetable garden                 | □ | □ | □ |              | □ | □ | □ |    | ■ | ■ | □ |     |
| 107                      | Sr102       | City Park                        | □ | □ | □ |              | □ | □ | □ |    | ■ | ■ | □ | p12 |
| 108                      | Sr103       | City Park                        | ■ | ■ | ■ | <i>cadA6</i> | □ | □ | □ |    | ■ | □ | □ |     |
| 109                      | Sr104       | City Park                        | □ | □ | □ |              | □ | □ | □ |    | ■ | □ | □ |     |
| 110                      | Sr105       | City Park                        | ■ | ■ | ■ | ND           | □ | □ | □ |    | ■ | ■ | □ | p13 |
| 111                      | Sr107       | City                             | □ | □ | □ |              | □ | □ | □ |    | ■ | ■ | □ |     |

|                           |             |                                  |   |   |   |                     |   |   |   |                          |   |   |   |             |
|---------------------------|-------------|----------------------------------|---|---|---|---------------------|---|---|---|--------------------------|---|---|---|-------------|
| 112                       | Sr108       | City                             | ■ | ■ | ■ | <i>cadA1</i>        | □ | □ | □ |                          | □ | □ | □ | p14         |
| 113                       | Sr109       | City                             | ■ | ■ | ■ | <i>cadA1</i>        | □ | □ | □ |                          | □ | □ | □ | p14         |
| 114                       | Sr110       | City                             | □ | □ | □ |                     | □ | □ | □ |                          | ■ | □ | □ |             |
| 115                       | Sr111       | City                             | □ | □ | □ |                     | □ | □ | □ |                          | ■ | □ | □ |             |
| 116                       | Sr112       | City                             | ■ | ■ | ■ | <i>cadA6</i>        | □ | □ | □ |                          | ■ | ■ | □ |             |
| 117                       | Sr113       | City                             | □ | □ | □ |                     | □ | □ | □ |                          | ■ | ■ | □ |             |
| 118                       | Sr114       | City                             | □ | □ | □ |                     | □ | □ | □ |                          | ■ | ■ | □ | p15         |
| 119                       | Sr115       | City                             | □ | □ | □ |                     | □ | □ | □ |                          | ■ | ■ | □ | p15         |
| 120                       | Sr116       | City                             | □ | □ | □ |                     | □ | □ | □ |                          | ■ | ■ | □ |             |
| 121                       | Sr136       | City Park „Park Praski”          | □ | □ | □ |                     | □ | □ | □ |                          | ■ | ■ | □ |             |
| 122                       | Sr137       | City Park „Park Praski”          | □ | □ | □ |                     | □ | □ | □ |                          | ■ | ■ | □ |             |
| 123                       | FSL H4-0088 | USA, water                       | □ | □ | □ |                     | □ | □ | □ |                          | ■ | □ | □ |             |
| 124                       | Sr155       | Field (farm)                     | □ | □ | □ |                     | □ | □ | □ |                          | ■ | □ | □ |             |
| <b><i>L. ivanovii</i></b> |             |                                  |   |   |   |                     |   |   |   |                          |   |   |   |             |
| 125                       | Sr8         | Swamps, Kampinoski National Park | □ | □ | □ |                     | □ | □ | □ |                          | ■ | □ | □ |             |
| 126                       | Sr11        | Fruit orchard                    | ■ | ■ | □ | <i>cadA6, cadA1</i> | ■ | □ | □ | <i>arsA</i> (Tn554-like) | ■ | ■ | □ | p16 (pLIS6) |
| 127                       | Sr16        | Vegetable garden                 | ■ | ■ | □ | <i>cadA6</i>        | ■ | □ | □ | <i>arsA</i> (Tn554-like) | □ | □ | □ | p16         |
| 128                       | Sr19        | Vegetable garden                 | ■ | ■ | □ | <i>cadA1</i>        | ■ | □ | □ | <i>arsA</i> (Tn554-like) | □ | □ | □ | p17         |
| 129                       | Sr20        | Vegetable garden                 | ■ | □ | □ |                     | ■ | □ | □ | <i>arsA</i> (Tn554-like) | ■ | ■ | □ |             |
| 130                       | Sr21        | Vegetable garden                 | ■ | □ | □ |                     | ■ | □ | □ | <i>arsA</i> (Tn554-like) | ■ | □ | □ |             |

|                             |             |                              |                          |                          |                          |              |                          |                          |                          |                          |                          |                          |                          |     |
|-----------------------------|-------------|------------------------------|--------------------------|--------------------------|--------------------------|--------------|--------------------------|--------------------------|--------------------------|--------------------------|--------------------------|--------------------------|--------------------------|-----|
| 131                         | Sr27        | Garden                       | <input type="checkbox"/> | <input type="checkbox"/> | <input type="checkbox"/> |              | <input type="checkbox"/> | <input type="checkbox"/> | <input type="checkbox"/> |                          | ■                        | <input type="checkbox"/> | <input type="checkbox"/> |     |
| 132                         | Sr30        | Manure                       | <input type="checkbox"/> | <input type="checkbox"/> | <input type="checkbox"/> |              | ■                        | <input type="checkbox"/> | <input type="checkbox"/> | <i>arsA</i> (Tn554-like) | ■                        | <input type="checkbox"/> | <input type="checkbox"/> |     |
| 133                         | Sr37        | Forest                       | <input type="checkbox"/> | <input type="checkbox"/> | <input type="checkbox"/> |              | <input type="checkbox"/> | <input type="checkbox"/> | <input type="checkbox"/> |                          | <input type="checkbox"/> | <input type="checkbox"/> | <input type="checkbox"/> |     |
| 134                         | Sr39        | Shrubs near fields           | <input type="checkbox"/> | <input type="checkbox"/> | <input type="checkbox"/> |              | <input type="checkbox"/> | <input type="checkbox"/> | <input type="checkbox"/> |                          | ■                        | <input type="checkbox"/> | <input type="checkbox"/> | p18 |
| 135                         | Sr42        | Forest                       | ■                        | <input type="checkbox"/> | <input type="checkbox"/> |              | ■                        | <input type="checkbox"/> | <input type="checkbox"/> | <i>arsA</i> (Tn554-like) | ■                        | ■                        | <input type="checkbox"/> |     |
| 136                         | Sr63        | City Park                    | ■                        | ■                        | <input type="checkbox"/> | <i>cadA1</i> | ■                        | <input type="checkbox"/> | <input type="checkbox"/> | <i>arsA</i> (Tn554-like) | <input type="checkbox"/> | <input type="checkbox"/> | <input type="checkbox"/> |     |
| 137                         | Sr76        | Forest                       | ■                        | ■                        | <input type="checkbox"/> | <i>cadA6</i> | ■                        | <input type="checkbox"/> | <input type="checkbox"/> | <i>arsA</i> (Tn554-like) | <input type="checkbox"/> | <input type="checkbox"/> | <input type="checkbox"/> |     |
| 138                         | Sr79        | Dry pine forest              | ■                        | ■                        | <input type="checkbox"/> | <i>cadA1</i> | ■                        | <input type="checkbox"/> | <input type="checkbox"/> | <i>arsA</i> (Tn554-like) | ■                        | ■                        | <input type="checkbox"/> |     |
| 139                         | Sr82        | Dry pine forest              | <input type="checkbox"/> | <input type="checkbox"/> | <input type="checkbox"/> |              | <input type="checkbox"/> | <input type="checkbox"/> | <input type="checkbox"/> |                          | <input type="checkbox"/> | <input type="checkbox"/> | <input type="checkbox"/> |     |
| 140                         | Sr139       | Field (farm)                 | <input type="checkbox"/> | <input type="checkbox"/> | <input type="checkbox"/> |              | <input type="checkbox"/> | <input type="checkbox"/> | <input type="checkbox"/> |                          | <input type="checkbox"/> | <input type="checkbox"/> | <input type="checkbox"/> | p19 |
| <b><i>L. welshimeri</i></b> |             |                              |                          |                          |                          |              |                          |                          |                          |                          |                          |                          |                          |     |
| 141                         | Sr38        | City Park „Park Saski”       | <input type="checkbox"/> | <input type="checkbox"/> | <input type="checkbox"/> |              | <input type="checkbox"/> | <input type="checkbox"/> | <input type="checkbox"/> |                          | ■                        | ■                        | <input type="checkbox"/> |     |
| 142                         | Sr54        | City Park „Park Saski”       | <input type="checkbox"/> | <input type="checkbox"/> | <input type="checkbox"/> |              | <input type="checkbox"/> | <input type="checkbox"/> | <input type="checkbox"/> |                          | ■                        | ■                        | <input type="checkbox"/> |     |
| 143                         | Sr83        | City Park „Pola Mokotowskie” | <input type="checkbox"/> | <input type="checkbox"/> | <input type="checkbox"/> |              | <input type="checkbox"/> | <input type="checkbox"/> | <input type="checkbox"/> |                          | ■                        | <input type="checkbox"/> | <input type="checkbox"/> |     |
| 144                         | Sr84        | City Park „Pola Mokotowskie” | <input type="checkbox"/> | <input type="checkbox"/> | <input type="checkbox"/> |              | <input type="checkbox"/> | <input type="checkbox"/> | <input type="checkbox"/> |                          | ■                        | ■                        | <input type="checkbox"/> |     |
| 145                         | Sr133       | City Park „Park Praski”      | <input type="checkbox"/> | <input type="checkbox"/> | <input type="checkbox"/> |              | <input type="checkbox"/> | <input type="checkbox"/> | <input type="checkbox"/> |                          | ■                        | <input type="checkbox"/> | <input type="checkbox"/> |     |
| 146                         | Sr135       | City Park „Park Praski”      | <input type="checkbox"/> | <input type="checkbox"/> | <input type="checkbox"/> |              | <input type="checkbox"/> | <input type="checkbox"/> | <input type="checkbox"/> |                          | ■                        | <input type="checkbox"/> | <input type="checkbox"/> |     |
| 147                         | Sr138       | City Park „Park Praski”      | <input type="checkbox"/> | <input type="checkbox"/> | <input type="checkbox"/> |              | <input type="checkbox"/> | <input type="checkbox"/> | <input type="checkbox"/> |                          | ■                        | <input type="checkbox"/> | <input type="checkbox"/> |     |
| 148                         | FSL H4-0277 | USA, water                   | <input type="checkbox"/> | <input type="checkbox"/> | <input type="checkbox"/> |              | <input type="checkbox"/> | <input type="checkbox"/> | <input type="checkbox"/> |                          | <input type="checkbox"/> | <input type="checkbox"/> | <input type="checkbox"/> |     |
| 149                         | FSL S4-0070 | USA, pristine soil           | <input type="checkbox"/> | <input type="checkbox"/> | <input type="checkbox"/> |              | <input type="checkbox"/> | <input type="checkbox"/> | <input type="checkbox"/> |                          | ■                        | <input type="checkbox"/> | <input type="checkbox"/> |     |
| 150                         | FSL S4-     | USA, pristine water          | <input type="checkbox"/> | <input type="checkbox"/> | <input type="checkbox"/> |              | <input type="checkbox"/> | <input type="checkbox"/> | <input type="checkbox"/> |                          | ■                        | <input type="checkbox"/> | <input type="checkbox"/> |     |



|                          |             |                              |                          |                          |                          |  |                          |                          |                          |  |   |                          |                          |  |
|--------------------------|-------------|------------------------------|--------------------------|--------------------------|--------------------------|--|--------------------------|--------------------------|--------------------------|--|---|--------------------------|--------------------------|--|
|                          | 0101        |                              |                          |                          |                          |  |                          |                          |                          |  |   |                          |                          |  |
| 151                      | FSL S4-0105 | USA,pristine field           | <input type="checkbox"/> | <input type="checkbox"/> | <input type="checkbox"/> |  | <input type="checkbox"/> | <input type="checkbox"/> | <input type="checkbox"/> |  | ■ | <input type="checkbox"/> | <input type="checkbox"/> |  |
| <b><i>L. marthii</i></b> |             |                              |                          |                          |                          |  |                          |                          |                          |  |   |                          |                          |  |
| 152                      | FSL S4-0120 | USA, pristine forest soil    | <input type="checkbox"/> | <input type="checkbox"/> | <input type="checkbox"/> |  | <input type="checkbox"/> | <input type="checkbox"/> | <input type="checkbox"/> |  | ■ | <input type="checkbox"/> | <input type="checkbox"/> |  |
| 153                      | FSL S4-0696 | USA, pristine standing water | <input type="checkbox"/> | <input type="checkbox"/> | <input type="checkbox"/> |  | <input type="checkbox"/> | <input type="checkbox"/> | <input type="checkbox"/> |  | ■ | <input type="checkbox"/> | <input type="checkbox"/> |  |
| 154                      | FSL S4-0710 | USA, pristine flowing water  | <input type="checkbox"/> | <input type="checkbox"/> | <input type="checkbox"/> |  | <input type="checkbox"/> | <input type="checkbox"/> | <input type="checkbox"/> |  | ■ | <input type="checkbox"/> | <input type="checkbox"/> |  |
| 155                      | FSL S4-0965 | USA, pristine flowing water  | <input type="checkbox"/> | <input type="checkbox"/> | <input type="checkbox"/> |  | <input type="checkbox"/> | <input type="checkbox"/> | <input type="checkbox"/> |  | ■ | <input type="checkbox"/> | <input type="checkbox"/> |  |

<sup>1</sup> ND – not determined resistance determinant
